# Supplementary material for: Pattern Analysis of Galectin 1, 3, and 9 Serum Levels in Breast Cancer
Source: Preprints.org preprint supplement (doi:10.20944/preprints202306.1803.v1), 2023-06-26
Supplement: Supplementary file 1 [file supplementary]

## Sheet: Final Complete Galectin Sheet
Gal-1	Gal-3	Gal-9	Gender	Ethnicity	Race	Diagnosis	Cancer Tissue	T	N	M	Stage	Histology	Broad Histology	Specimen Type	Spec Considered	Tissue Site	Specimen age in years	Specimen Collection Year	Patient Birth Year	Age at Collection	Smoking History	Tissue Exposure	Rad Tissue Exposure	Chemo	Hormonal Therapy	Immunotherapy	IHC Assay ER	IHC ER %	IHC Assay PR	IHC PR %	IHC Assay HER-2	FISH Test HER-2	Treatment Status	ER/PR/HER	HR/HER	Simple Subtype	Grade
26.43	4.775	8.667	Female	Non-Spanish; Non-Hispanic	White	Breast Cancer	Breast	T3	N1	M0	III	Benign		Serum	Benign	Breast	6	2016	1973	44	Never smoked	Yes	No				negative		negative		Amplified		Neoadjuvant	-/-/+	HR-/HER+	HER2 Enriched
31.5	11.27	9.867	Female	Non-Spanish; Non-Hispanic	White	Breast Cancer	Breast	T2			II	Lobular	Lobular	Serum	Primary	Breast	4	2017	1935	82	Never smoked						positive	83	negative		Not Amplified	Not Amplified		+/-/-	HR+/HER-	Luminal A
18.59	6.837	9.573	Female	Spanish; Hispanic	Latino	Breast Cancer	Breast	T1	N0	M0	I	Apocrine	Apocrine	Serum	Primary	Breast	5	2017	1963	53	Never smoked	No	No				positive	93	positive	78	Not Amplified			+/+/-	HR+/HER-	Luminal A
27.78	9.887	10.41	Female	Non-Spanish; Non-Hispanic	White	Breast Cancer	Breast	T1	N0	M0	I	Ductal	Ductal	Serum	Primary	Breast	7	2015	1945	70	Never smoked	No	No				positive	95	positive		Amplified			+/+/+	HR+/HER+	Luminal A
27.08	12.06	8.644	Female	Non-Spanish; Non-Hispanic	White	Breast Cancer	Breast	T1	N0		I	Benign		Serum	Benign	Lymph Node	4	2017	1953	64	Never smoked	No	No	No	No	No	positive	80	positive	47	Amplified			+/+/+	HR+/HER+	Luminal A
32.78	9.143	9.12	Female	Non-Spanish; Non-Hispanic	Black, African American	Breast Cancer	Breast	T1	N2		III	Apocrine	Apocrine	Serum	Primary	Breast	4	2017	1985	32	Previous smoker	Yes	No				positive	100	positive	98	Amplified			+/+/+	HR+/HER+	Luminal A
33.2	4.284		Female	Non-Spanish; Non-Hispanic	White	Breast Cancer	Breast	T2	N0		I	Apocrine	Apocrine	Serum	Primary	Breast	5	2017	1971	45	Previous smoker	Yes	No				positive	88	negative		Amplified	Amplified	Adjuvant	+/-/+	HR+/HER+	Luminal A
17.23	11.08	7.391	Female	Non-Spanish; Non-Hispanic	White	Breast Cancer	Breast	T2	N0	M0	II	Apocrine	Apocrine	Serum	Primary	Breast	5	2017	1963	53	Never smoked	Yes	No				positive	84	positive	85	Not Amplified	Not Amplified	Neoadjuvant	+/+/-	HR+/HER-	Luminal A
19.8	2.631	8.03	Female	Non-Spanish; Non-Hispanic	White	Breast Cancer	Breast	T1	N1		II	Ductal	Ductal	Serum	Recurrence	Chest Wall	5	2016	1948	69	Previous smoker	Yes	No				positive		positive		Amplified		Adjuvant	+/+/+	HR+/HER+	Luminal B
11.98	7.679	3.607	Female	Non-Spanish; Non-Hispanic	White	Breast Cancer	Breast	T1	N0		I	Apocrine	Apocrine	Serum	Primary	Breast	6	2016	1962	54	Current smoker	No					negative		negative		Not Amplified			-/-/-	HR-/HER-	Triple Negative
	7.528	5.37	Female	Non-Spanish; Non-Hispanic	White	Breast Cancer	Breast	T3	N0		II	Apocrine	Apocrine	Serum	Primary	Breast	5	2016	1961	56	Never smoked	Yes	No				negative		negative		Not Amplified			-/-/-	HR-/HER-	Triple Negative
21.98	8.069		Female	Non-Spanish; Non-Hispanic	White	Breast Cancer	Breast	T2	N2		III	Ductal	Ductal	Serum	Primary	Breast	7	2015	1964	52	Current smoker						positive	79	positive	21	Not Amplified			+/+/-	HR+/HER-	Luminal A
18.07	8.851		Female	Non-Spanish; Non-Hispanic	White	Breast Cancer	Breast	T1	N0		I	Ductal	Ductal	Serum	Primary	Breast	7	2015	1966	50	Never smoked						negative		negative		Not Amplified			-/-/-	HR-/HER-	Triple Negative
14.77	6.712		Female	Non-Spanish; Non-Hispanic	White	Breast Cancer	Breast	T2	N1	M0	II	Ductal	Ductal	Serum	Primary	Breast	6		1963	53	Previous smoker	No	No				positive	59	negative		Not Amplified			+/-/-	HR+/HER-	Luminal B
50.76	13.43		Female	Non-Spanish; Non-Hispanic	White	Breast Cancer	Breast	T4	N2		III	Apocrine	Apocrine	Serum	Primary	Breast	6	2016	1947	69	Previous smoker	Yes	No				positive	78	positive	35	Not Amplified		Neoadjuvant	+/+/-	HR+/HER-	Luminal A
21.06	7.677		Female	Non-Spanish; Non-Hispanic	White	Breast Cancer	Breast	T1	N0	M0	I	Ductal	Ductal	Serum	Primary	Breast	7	2015	1962	53	Never smoked						positive	77	positive	72	Not Amplified			+/+/-	HR+/HER-	Luminal A
27.85	7.562		Female	Non-Spanish; Non-Hispanic	White	Breast Cancer	Breast	T2	N1	M0	II	Ductal	Ductal	Serum	Primary	Breast	6	2016	1965	52	Previous smoker	Yes	No				positive	100	positive	100	Not Amplified		Neoadjuvant	+/+/-	HR+/HER-	Luminal A
19.09	3.658	8.632	Female	Non-Spanish; Non-Hispanic	White	Breast Cancer	Breast	T2	N3	M1	IV	Ductal	Ductal	Serum	Primary	Breast	7	2015	1952	63	Never smoked	No	No				positive	95	positive	78	Not Amplified			+/+/-	HR+/HER-	Luminal A
18.27	5.606		Female	Non-Spanish; Non-Hispanic	White	Breast Cancer	Breast				II	Apocrine	Apocrine	Serum	Primary	Breast	5	2017	1974	42	Previous smoker	Yes	No				positive	63	negative		Amplified		Adjuvant	+/-/+	HR+/HER+	Luminal B
33.47	11.27		Female	Non-Spanish; Non-Hispanic	Black, African American	Breast Cancer	Breast	T2	N2		III	Ductal	Ductal	Serum	Primary	Breast	5	2017	1980	36	Never smoked	Yes	No				positive	92	negative		Amplified	Amplified	Neoadjuvant	+/-/+	HR+/HER+	Luminal A
16.24	9.698	8.848	Female	Non-Spanish; Non-Hispanic	White	Breast Cancer	Breast	T1	N0	M0	I	Benign		Serum	Benign	Breast	6	2016	1950	66	Previous smoker	Yes	No				negative		negative		Not Amplified		Neoadjuvant	-/-/-	HR-/HER-	Triple Negative
29.77	11.75		Female	Non-Spanish; Non-Hispanic	White	Breast Cancer	Breast				III	Ductal	Ductal	Serum	Primary	Breast	5	2016	1958	59	Never smoked	Yes	No				positive	95	negative		Amplified		Neoadjuvant	+/-/+	HR+/HER+	Luminal A
42.57	10.14		Female	Non-Spanish; Non-Hispanic	White	Breast Cancer	Breast	T2	N1	M0	II	Ductal	Ductal	Serum	Primary	Breast	7	2015	1935	80							positive	94	positive	80	Amplified	Amplified		+/+/+	HR+/HER+	Luminal A
30.71		10.72	Female	Non-Spanish; Non-Hispanic	White	Breast Cancer	Breast	T1	N0		I	Ductal	Ductal	Serum	Primary	Breast	7	2015	1947	69	Previous smoker						positive	96	positive	60	Amplified	Amplified		+/+/+	HR+/HER+	Luminal A
36.45	5.873		Female	Non-Spanish; Non-Hispanic	White	Breast Cancer	Breast	T1	N0	M0	I	Ductal	Ductal	Serum	Primary	Breast	4	2018	1952	65	Never smoked	No	No				positive	15	positive	2	Not Amplified			+/+/-	HR+/HER-	Luminal B
27.22	11.56	12.39	Female	Non-Spanish; Non-Hispanic	White	Breast Cancer	Breast	T3	N0	M0	II	Lobular	Lobular	Serum	Primary	Breast	5	2017	1960	58	Current smoker	No	No				positive	78	positive	43	Not Amplified			+/+/-	HR+/HER-	Luminal A
40.82	9.705	18.2	Female	Non-Spanish; Non-Hispanic	White	Breast Cancer	Breast	T1	N0	M0	I	Ductal	Ductal	Serum	Metastatic	Neck	7	2015	1947	68	Current smoker	No	No				negative		negative		Not Amplified			-/-/-	HR-/HER-	Triple Negative
17.31	7.644		Female	Non-Spanish; Non-Hispanic	White	Breast Cancer	Breast	T2	N0		II	Carcinoma	Carcinoma	Serum	Primary	Breast	5	2017	1946	70	Never smoked	Yes					positive	81	negative		Amplified	Amplified	Neoadjuvant	+/-/+	HR+/HER+	Luminal A
20.36	13.73		Female	Non-Spanish; Non-Hispanic	White	Breast Cancer	Breast	T1	N0	M0	I	Apocrine	Apocrine	Serum	Recurrence	Breast	6	2016	1933	82	Previous smoker	Yes	No		Yes		positive	90	negative		Not Amplified		Hormone Only	+/-/-	HR+/HER-	Luminal A
14.02	6.059		Female	Non-Spanish; Non-Hispanic	White	Breast Cancer	Breast	T2	N0	M0	II	Ductal	Ductal	Serum	Primary	Breast	6	2016	1997	19	Never smoked	No	No				positive	83	positive	35	Amplified	Amplified		+/+/+	HR+/HER+	Luminal A
24.7	7.876		Female	Non-Spanish; Non-Hispanic	White	Breast Cancer	Breast	T1	N0	M0	I	Mucinous Adenocarcinoma	Adenocarcinoma	Serum	Primary	Breast	7	2015	1943	72	Never smoked	No	No				positive	89	positive	93	Not Amplified			+/+/-	HR+/HER-	Luminal A
57.99	12.05		Female	Non-Spanish; Non-Hispanic	White	Breast Cancer	Breast	T1	N1		II	Apocrine	Apocrine	Serum	Primary	Breast	4	2017	1989	29	Never smoked	Yes	No				positive	97	positive	92	Amplified	Amplified	Neoadjuvant	+/+/+	HR+/HER+	Luminal A
28.24	7.708		Female	Non-Spanish; Non-Hispanic	Black, African American	Breast Cancer	Breast	T1	N0		II	Ductal	Ductal	Serum	Primary	Breast	5	2016	1968	49	Never smoked	Yes	No				positive	70	positive	40	Amplified		Neoadjuvant	+/+/+	HR+/HER+	Luminal A
54.15	6.349		Female	Non-Spanish; Non-Hispanic	White	Breast Cancer	Breast				II	Ductal	Ductal	Serum	Primary	Breast	7	2015	1938	77	Previous smoker						negative		negative		Not Amplified			-/-/-	HR-/HER-	Triple Negative
15.24	9.086		Female	Non-Spanish; Non-Hispanic	Black, African American	Breast Cancer	Breast	T1	N0	M0	I	Ductal	Ductal	Serum	Recurrence	Chest Wall	6	2016	1971	46	Previous smoker	No	No				negative		negative		Not Amplified			-/-/-	HR-/HER-	Triple Negative
16.85	17.91		Female	Non-Spanish; Non-Hispanic	White	Breast Cancer	Breast	T1			I	Ductal	Ductal	Serum	Primary	Breast		2022	1949	73	Previous smoker	No	No	No	No	No	positive	78.26	positive	56.59	Not Amplified			+/+/-	HR+/HER-	Luminal A
13.61	8.943		Female	Non-Spanish; Non-Hispanic	White	Breast Cancer	Breast	T2	N1		II	Apocrine	Apocrine	Serum	Primary	Breast	6	2016	1971	45	Never smoked	Yes	No				positive	96	positive	97	Not Amplified		Hormone Only	+/+/-	HR+/HER-	Luminal A
31.45	11.32	11.08	Female	Non-Spanish; Non-Hispanic	White	Breast Cancer	Breast				II	Adenocarcinoma	Adenocarcinoma	Serum	Metastatic	Liver	7	2015	1952	63	Previous smoker	Yes	No	Yes			negative		negative		Not Amplified		Metastatic/Palliative	-/-/-	HR-/HER-	Triple Negative
24.25	10.91	12.73	Female	Non-Spanish; Non-Hispanic	White	Breast Cancer	Breast	T1	N0		I	Ductal	Ductal	Serum	Metastatic	Lymph Node	6	2016	1968	48	Never smoked	Yes	No				positive	58	negative		Amplified	Amplified	Adjuvant	+/-/+	HR+/HER+	Luminal B
10.95	10.39		Female	Non-Spanish; Non-Hispanic	White	Breast Cancer	Breast	T1	N0	M0	I	Ductal	Ductal	Serum	Primary	Breast		2022	1973	48	Never smoked	No	No	No	No	No	positive	93.92	positive	80.74	Not Amplified			+/+/-	HR+/HER-	Luminal A
23.61	12.67		Female	Non-Spanish; Non-Hispanic	White	Breast Cancer	Breast	T1	N0	M0	I	Ductal	Ductal	Serum	Primary	Breast	4	2018	1946	72	Current smoker	No	Yes				positive	100	positive	70	Not Amplified			+/+/-	HR+/HER-	Luminal A
26.74	4.08	10.39	Female	Non-Spanish; Non-Hispanic	White	Breast Cancer	Breast	T2	N1		II	Ductal	Ductal	Serum	Primary	Breast	7	2015	1972	43	Previous smoker	Yes	No	Yes			negative		negative		Not Amplified			-/-/-	HR-/HER-	Triple Negative
14.62	9.052		Female	Non-Spanish; Non-Hispanic	White	Breast Cancer	Breast	T1	N0	M0	I	Apocrine	Apocrine	Serum	Primary	Breast	6	2016	1950	65	Never smoked	Yes	No				positive	73	positive	58	Amplified		Neoadjuvant	+/+/+	HR+/HER+	Luminal A
34.26	18.33	13.06				Breast Cancer	Breast	T1	N1		II	Lobular	Lobular	Serum	Primary	Breast	5	2017			Previous smoker	Yes	No				positive	73	positive	72	Not Amplified		Adjuvant	+/+/-	HR+/HER-	Luminal A
21.61	11.34		Female	Non-Spanish; Non-Hispanic	White	Breast Cancer	Breast	T1	N0	M0	I	Ductal	Ductal	Serum	Primary	Breast	6	2015	1948	68	Never smoked						positive	98	positive	95	Not Amplified			+/+/-	HR+/HER-	Luminal A
27.67	4.405	6.279	Female	Non-Spanish; Non-Hispanic	Asian	Breast Cancer	Breast				II	Ductal	Ductal	Serum	Primary	Breast	7	2015	1970	46	Never smoked	Yes	No	Yes			positive	74	positive	56	Not Amplified		Neoadjuvant	+/+/-	HR+/HER-	Luminal A
30	14.48		Female	Spanish; Hispanic	Latino	Breast Cancer	Breast	T1	N1		I	Apocrine	Apocrine	Serum	Primary	Breast	4	2017	1962	55	Previous smoker	No	No				positive	85	positive	86	Not Amplified			+/+/-	HR+/HER-	Luminal A
43.62	17.1		Female	Spanish; Hispanic	White	Breast Cancer	Breast				III	Ductal	Ductal	Serum	Primary	Breast	6	2016			Current smoker	Yes	No				positive	79	positive	10	Amplified			+/+/+	HR+/HER+	Luminal A
15.66	4.788	7.019	Female	Non-Spanish; Non-Hispanic	White	Breast Cancer	Breast				I	Ductal	Ductal	Serum	Primary	Breast	7	2014	1953	61	Never smoked						negative		negative		Amplified			-/-/+	HR-/HER+	HER2 Enriched
13.92	4.131		Female	Non-Spanish; Non-Hispanic	White	Breast Cancer	Breast				I	Ductal	Ductal	Serum			7	2015	1960	54							positive	90	negative		Amplified			+/-/+	HR+/HER+	Luminal A
24.15	7.008		Female	Non-Spanish; Non-Hispanic	Black, African American	Breast Cancer	Breast	T2	N0	M0	II	Benign		Serum	Benign	Breast		2022	1992	30	Never smoked	Yes	No	Yes	No	No	negative		negative		Not Amplified		Neoadjuvant	-/-/-	HR-/HER-	Triple Negative
11.48	9.152		Female	Non-Spanish; Non-Hispanic	White	Breast Cancer	Breast	T1	N0	M0	I	Apocrine	Apocrine	Serum	Primary	Breast	6	2016	1958	58	Current smoker	No					positive	99	positive	94	Amplified	Amplified		+/+/+	HR+/HER+	Luminal A
22.7	18.48		Female	Non-Spanish; Non-Hispanic	Black, African American	Breast Cancer	Breast				I	Ductal	Ductal	Serum	Primary	Breast	7	2015	1943	71							positive	94	positive	41	Not Amplified			+/+/-	HR+/HER-	Luminal A
26.07	10.67		Female	Non-Spanish; Non-Hispanic	White	Breast Cancer	Breast	T3	N0	M0	III	Metaplastic	Metaplastic	Serum	Primary	Breast		2022	1961	61	Current smoker	No	No	No	No	No	negative		negative		Not Amplified			-/-/-	HR-/HER-	Triple Negative
13.82	12.43	5.481	Female	Non-Spanish; Non-Hispanic	White	Breast Cancer	Breast	T1	N0	M0	I	Invasive Ductal	Ductal	Serum	Recurrence	Breast	6	2015	1948	67	Previous smoker						negative		negative		Not Amplified					Triple Negative	3
28.22	7.608		Female	Non-Spanish; Non-Hispanic	Black, African American	Breast Cancer	Breast	T1	N1	M0	II	Benign		Serum	Benign	Breast	6	2016	1960	57	Never smoked	Yes	No				negative		negative		Not Amplified			-/-/-	HR-/HER-	Triple Negative
11.23	16.35		Female	Non-Spanish; Non-Hispanic	White	Breast Cancer	Breast				II	Carcinoma	Carcinoma	Serum	Metastatic	Lymph Node	4	2018	1947	71	Previous smoker	No	No				negative		negative		Not Amplified		Adjuvant	-/-/-	HR-/HER-	Triple Negative
22.05	9.5		Female	Non-Spanish; Non-Hispanic	White	Breast Cancer	Breast		N1		II	Ductal	Ductal	Serum	Primary	Breast	7	2015	1950	65	Current smoker						positive	96	positive	41	Amplified	Amplified		+/+/+	HR+/HER+	Luminal A
17.65	7.043	9.191	Female	Non-Spanish; Non-Hispanic	White	Breast Cancer	Breast	T1	N0	M0	I	DCIS	Ductal	Serum	Recurrence	Breast	8	2014	1956	59	Never smoked	No	Yes				negative		negative		Amplified	Amplified		-/-/+	HR-/HER+	HER2 Enriched
26.75	14.06		Female	Non-Spanish; Non-Hispanic	Black, African American	Breast Cancer	Breast	T1	N0		I	Ductal	Ductal	Serum	Primary	Breast	6	2015	1926	89	Previous smoker						positive	99	positive	71	Not Amplified	Not Amplified		+/+/-	HR+/HER-	Luminal A
61.15	15.93	33.95	Female	Non-Spanish; Non-Hispanic	White	Breast Cancer	Breast	T2	N0		II	Ductal	Ductal	Serum	Primary	Breast	4	2017	1946	71	Never smoked	No	No	No	No	No	negative		negative		Amplified			-/-/+	HR-/HER+	HER2 Enriched
11.99	8.998		Female	Non-Spanish; Non-Hispanic	White	Breast Cancer	Breast	T1	N0	M0	I	Ductal	Ductal	Serum	Primary	Breast	6	2016	1957	59	Never smoked	Yes					negative		negative		Not Amplified		Neoadjuvant	-/-/-	HR-/HER-	Triple Negative
17.82	10.06	6.122	Female	Non-Spanish; Non-Hispanic	Black, African American	Breast Cancer	Breast	T1	N0		I	Lobular	Lobular	Serum	Metastatic	Ovary	6	2016	1965	51	Previous smoker	Yes	No				positive	33	positive	35	Not Amplified		Hormone Only	+/+/-	HR+/HER-	Luminal B
25.74	9.824	24.69	Female	Non-Spanish; Non-Hispanic	White	Breast Cancer	Breast				II	Apocrine	Apocrine	Serum	Primary	Breast	5	2017	1965	52	Never smoked	Yes					negative		negative		Amplified		Neoadjuvant	-/-/+	HR-/HER+	HER2 Enriched
17.14	16.16	9.189	Female	Non-Spanish; Non-Hispanic	White	Breast Cancer	Breast	T2	N0		I	Apocrine	Apocrine	Serum	Recurrence	Breast	6	2016	1938	77	Never smoked	Yes	Yes				negative		negative		Amplified		Neoadjuvant	-/-/+	HR-/HER+	HER2 Enriched
21.31	8.674	8.663	Female	Non-Spanish; Non-Hispanic	Asian	Breast Cancer	Breast				I	Ductal	Ductal	Serum	Primary	Breast	8	2014	1959	55	Never smoked						negative		negative		Amplified			-/-/+	HR-/HER+	HER2 Enriched
16.28	7.501	6.399	Female	Non-Spanish; Non-Hispanic	White	Breast Cancer	Breast	T2			II	Adenocarcinoma	Adenocarcinoma	Serum	Metastatic	Brain	5	2017	1970	47	Never smoked	No	Yes	No	No	No	negative		negative		Not Amplified			-/-/-	HR-/HER-	Triple Negative
21.44	11.23		Female	Non-Spanish; Non-Hispanic	White	Breast Cancer	Breast	T1	N0		I	Apocrine	Apocrine	Serum	Primary	Breast	6	2016	1937	78	Never smoked	No					positive	85	positive	62	Amplified	Amplified		+/+/+	HR+/HER+	Luminal A
12.94	3.984		Female	Non-Spanish; Non-Hispanic	White	Breast Cancer	Breast	T1	N0		I	Ductal	Ductal	Serum	Primary	Breast	6	2016	1961	55	Never smoked	No	No				positive	72	positive	67	Not Amplified	Not Amplified		+/+/-	HR+/HER-	Luminal A
19.82	10.94		Female	Non-Spanish; Non-Hispanic	White	Breast Cancer	Breast	T2	N0	M0	II	Ductal	Ductal	Serum	Primary	Breast		2022	1990	32	Never smoked	Yes	No	Yes	No	No	negative		negative		Not Amplified		Neoadjuvant	-/-/-	HR-/HER-	Triple Negative
24.89	12.73		Female	Non-Spanish; Non-Hispanic	White	Breast Cancer	Breast	T1	N0	M0	I	Carcinoma	Carcinoma	Serum	Primary	Breast	5	2017	1976	41	Never smoked	Yes					negative		negative		Not Amplified		Neoadjuvant	-/-/-	HR-/HER-	Triple Negative
36.8	11.61		Female	Non-Spanish; Non-Hispanic	White	Breast Cancer	Breast	T3	N0	M0	II	Apocrine	Apocrine	Serum	Primary	Breast	5	2017	1964	53	Current smoker	Yes	No				positive	40	negative		Not Amplified		Neoadjuvant	+/-/-	HR+/HER-	Luminal B
13.47	7.555		Female	Non-Spanish; Non-Hispanic	Asian	Breast Cancer	Breast	T1	N0		I	Apocrine	Apocrine	Serum	Primary	Breast	5	2017	1967	50	Never smoked	No	No				positive	96.5	positive	98.7	Not Amplified			+/+/-	HR+/HER-	Luminal A
22.72	8.677		Female	Non-Spanish; Non-Hispanic	White	Breast Cancer	Breast	T2	N0	M0	II	Apocrine	Apocrine	Serum	Primary	Breast	5	2017	1958	59	Previous smoker	Yes	No	Yes			negative		negative		Not Amplified		Neoadjuvant	-/-/-	HR-/HER-	Triple Negative
16.04	6.26		Female	Non-Spanish; Non-Hispanic	White	Breast Cancer	Breast	T1	N1		II	Ductal	Ductal	Serum	Primary	Breast	8	2014	1945	69	Previous smoker	No	No				positive	83	positive	59	Amplified			+/+/+	HR+/HER+	Luminal A
20.54	10.47		Female	Non-Spanish; Non-Hispanic	White	Breast Cancer	Breast	T2	N2	M0	III	Ductal	Ductal	Serum	Metastatic	Lymph Node	7	2015	1978	37	Never smoked	No	Yes				negative		negative		Not Amplified			-/-/-	HR-/HER-	Triple Negative
14.69	5.082	7.596	Female	Non-Spanish; Non-Hispanic	White	Breast Cancer	Breast	T2	N1		I	Carcinoma	Carcinoma	Serum	Primary	Breast		2022	1981	40	Previous smoker	No	No	No	No	No	positive	94.12	positive	29.61	Not Amplified			+/+/-	HR+/HER-	Luminal A
30.74	6.899		Female	Non-Spanish; Non-Hispanic	White	Breast Cancer	Breast	T2	N0		II	DCIS	Ductal	Serum	Primary	Breast	5	2017	1964	52	Never smoked	Yes	No				positive	95	positive	88	Amplified		Neoadjuvant	+/+/+	HR+/HER+	Luminal A
24.59	13.57		Female	Non-Spanish; Non-Hispanic	White	Breast Cancer	Breast	T2	N0	M0	II	Benign		Serum	Benign	Breast	6	2016	1985	32	Previous smoker	Yes	No				negative		negative		Not Amplified	Not Amplified	Neoadjuvant	-/-/-	HR-/HER-	Triple Negative
15.71	8.649	6.407	Female	Non-Spanish; Non-Hispanic	White	Breast Cancer	Breast				II	Ductal	Ductal	Serum	Primary	Breast	7	2015	1949	65							negative		negative		Amplified			-/-/+	HR-/HER+	HER2 Enriched
23.17	2.763	9.598	Female	Non-Spanish; Non-Hispanic	White	Breast Cancer	Breast				II	Apocrine	Apocrine	Serum	Metastatic	Breast	5	2017	1936	80	Never smoked	No	No				negative		negative		Not Amplified	Not Amplified		-/-/-	HR-/HER-	Triple Negative
26.76	9.644		Female	Non-Spanish; Non-Hispanic	Black, African American	Breast Cancer	Breast	T1	N0	M0	I	Mucinous	Adenocarcinoma	Serum	Primary	Breast	5	2017	1969	48	Never smoked	Yes	No				positive	99	positive	99	Not Amplified		Hormone Only	+/+/-	HR+/HER-	Luminal A
30.22	3.777		Female	Non-Spanish; Non-Hispanic	White	Breast Cancer	Breast	T2	N1	M0	II	Adenocarcinoma	Adenocarcinoma	Serum	Recurrence	Lung		2022	1951	71	Previous smoker	No	No	Yes	Yes	No	positive	96.81	positive	25.23	Not Amplified			+/+/-	HR+/HER-	Luminal A
14.52	6.351	8.949	Female	Non-Spanish; Non-Hispanic	White	Breast Cancer	Breast	T2	N0		II	Apocrine	Apocrine	Serum	Primary	Breast	4	2017	1969	48	Never smoked	Yes	No				positive	90	positive	65	Amplified	Amplified	Neoadjuvant	+/+/+	HR+/HER+	Luminal A
17.7	7.906		Female	Non-Spanish; Non-Hispanic	White	Breast Cancer	Breast	T2	N0	M0	II	Ductal	Ductal	Serum	Primary	Breast	6	2015	1954	61	Previous smoker						positive	90	negative		Not Amplified			+/-/-	HR+/HER-	Luminal A
14.12	8.921	6.531	Female	Non-Spanish; Non-Hispanic	White	Breast Cancer	Breast				I	Ductal	Ductal	Serum	Primary	Breast	6	2015	1951	65	Never smoked						positive	94	positive	81	Amplified			+/+/+	HR+/HER+	Luminal A
23.74	7.116	9.089	Female	Non-Spanish; Non-Hispanic	White	Breast Cancer	Breast	T2	N1	M0	II	Ductal	Ductal	Serum	Metastatic	Axillary	6	2016	1964	51	Never smoked	No	No				positive	40	negative		Not Amplified	Not Amplified		+/-/-	HR+/HER-	Luminal B
17.13	6.815	9.634	Female	Non-Spanish; Non-Hispanic	White	Breast Cancer	Breast				II	Apocrine	Apocrine	Serum	Primary	Breast	5	2017	1973	44	Previous smoker	Yes	No				negative		negative		Not Amplified		Neoadjuvant	-/-/-	HR-/HER-	Triple Negative
29.51	11.24		Female	Non-Spanish; Non-Hispanic	White	Breast Cancer	Breast	T1	N0	M0	I	Ductal	Ductal	Serum	Primary	Breast	7	2015	1967	48	Current smoker	Yes	No	Yes			positive	91	positive	96	Amplified	Amplified	Neoadjuvant	+/+/+	HR+/HER+	Luminal A
22.36	8.171		Female	Non-Spanish; Non-Hispanic	White	Breast Cancer	Breast	T3	N1		III	Ductal	Ductal	Serum	Primary	Breast	5	2017	1982	34	Never smoked	Yes	No				positive	18	positive	1	Amplified		Adjuvant	+/+/+	HR+/HER+	Luminal B
26.37	11.56		Female	Non-Spanish; Non-Hispanic	White	Breast Cancer	Breast				II	Ductal	Ductal	Serum	Primary		7	2015	1946	68							positive	84	positive	80	Amplified			+/+/+	HR+/HER+	Luminal A
14.22	6.577		Female	Non-Spanish; Non-Hispanic	White	Breast Cancer	Breast				I	Ductal	Ductal	Serum	Primary	Breast	7	2015	1971	43	Never smoked						positive	88	positive	73	Amplified	Amplified		+/+/+	HR+/HER+	Luminal A
13.53	7.074		Female	Non-Spanish; Non-Hispanic	White	Breast Cancer	Breast	T1	N0		I	Ductal	Ductal	Serum	Primary	Breast	5	2017	1976	41	Never smoked	No	No				positive	41	positive	3	Amplified	Amplified		+/+/+	HR+/HER+	Luminal B
22.98	8.613			Non-Spanish; Non-Hispanic	White	Breast Cancer	Breast				III	Lobular	Lobular	Serum	Recurrence	Breast	7	2015	1953	63	Never smoked						negative		negative	7	Not Amplified			-/-/-	HR-/HER-	Triple Negative
37.75	17.32		Female	Non-Spanish; Non-Hispanic	Black, African American	Breast Cancer	Breast	T1	N1		I	Lobular	Lobular	Serum	Primary	Breast	5	2017	1943	74	Never smoked	Yes	No				positive	18	negative		Not Amplified		Neoadjuvant	+/-/-	HR+/HER-	Luminal B
24.39	7.003		Female	Non-Spanish; Non-Hispanic	Black, African American	Breast Cancer	Breast				I	Ductal	Ductal	Serum	Primary	Breast	7	2014	1966	48	Previous smoker						positive	62	positive	62	Not Amplified			+/+/-	HR+/HER-	Luminal B
21.64	5.216		Female	Non-Spanish; Non-Hispanic	White	Breast Cancer	Breast				I	Ductal	Ductal	Serum	Recurrence	Breast	7	2015	1946	69							negative		negative		Not Amplified			-/-/-	HR-/HER-	Triple Negative
15.53	3.121		Female	Non-Spanish; Non-Hispanic	White	Breast Cancer	Breast				I	Ductal	Ductal	Serum	Primary	Breast	7	2015	1976	39							negative		negative		Not Amplified			-/-/-	HR-/HER-	Triple Negative
24.66	14.28	11.41	Female	Non-Spanish; Non-Hispanic	Black, African American	Breast Cancer	Breast	T2	N0	M0	II	Ductal	Ductal	Serum	Primary	Breast	7	2015	1957	58	Never smoked	Yes	No	Yes			positive	46	positive	1	Amplified			+/+/+	HR+/HER+	Luminal B
31.61	12.47	8.709	Female	Non-Spanish; Non-Hispanic	Black, African American	Breast Cancer	Breast	T2	N2	M0	III	Ductal	Ductal	Serum	Primary	Breast	7	2015	1935	80	Current smoker	No	No				positive	92	positive	95	Amplified	Amplified		+/+/+	HR+/HER+	Luminal A
15.07	14.84	6.861	Female	Non-Spanish; Non-Hispanic	White	Breast Cancer	Breast	T1	N0		I	Invasive Ductal	Ductal	Serum	Primary	Breast	8	2013	1940	73	Never smoked						positive	24	negative		Amplified			+/-/+	HR+/HER+	Luminal B	2
27.21	12.38	12.98	Female	Non-Spanish; Non-Hispanic	White	Breast Cancer	Breast				I	Invasive Ductal	Ductal	Serum	Primary	Breast	8	2013	1945	68	Never smoked						positive	91	positive	95	Not Amplified			+/+/-	HR+/HER-	Luminal A	3
36.03	30.11	7.704	Female	Non-Spanish; Non-Hispanic	White	Breast Cancer	Breast	T1	N0	M0	I	Invasive Ductal	Ductal	Serum	Primary	Breast	8	2013	1941	72	Never smoked						positive	67	positive	80	Not Amplified			+/+/-	HR+/HER-	Luminal A	2
21.44	22.16	10.86	Female	Non-Spanish; Non-Hispanic	White	Breast Cancer	Breast	T1	N0	M0	I	Invasive Ductal	Ductal	Serum	Primary	Breast	5	2016	1946	70	Never smoked						negative		negative		Not Amplified			-/-/-	HR-/HER-	Triple Negative	2
31.76	30.46	13.57	Female	Non-Spanish; Non-Hispanic	White	Breast Cancer	Breast	T1	N0		I	Invasive Ductal	Ductal	Serum	Primary	Breast	6	2015	1940	75	Never smoked						positive	95	positive	36	Not Amplified					Luminal A	3
35.15	13.5	10.31	Female	Non-Spanish; Non-Hispanic	White	Breast Cancer	Breast	T1	N0		I	Invasive Ductal	Ductal	Serum	Primary	Breast	5	2016	1929	87	Never smoked						positive	97	positive	98	Amplified			+/+/+	HR+/HER+	Luminal A	3
15.65	9.362	5.487	Female	Non-Spanish; Non-Hispanic	White	Breast Cancer	Breast	T1	N0	M0	I	Invasive Ductal	Ductal	Serum	Primary	Breast	5	2016	1959	57	Current smoker						positive	92	positive	96	Not Amplified			+/+/-	HR+/HER-	Luminal A	1
25.38	18.05	11.87	Female	Non-Spanish; Non-Hispanic	White	Breast Cancer	Breast	T1	N0		I	Adenocarcinoma	Adenocarcinoma	Serum	Primary	Lymph Node	5	2016	1944	72	Previous smoker						positive	97	positive	2	Not Amplified			+/+/-	HR+/HER-	Luminal A	U
35.34	18.15	12.28	Female	Non-Spanish; Non-Hispanic	White	Breast Cancer	Breast	T1	N0	M0	I	Invasive Ductal	Ductal	Serum	Primary	Breast	5	2016	1932	84	Previous smoker						positive	89	positive	95	Not Amplified			+/+/-	HR+/HER-	Luminal A	1
18.04	12.24	5.761	Female	Non-Spanish; Non-Hispanic	White	Breast Cancer	Breast	T2	N1		II	Invasive Ductal	Ductal	Serum	Primary	Breast	8	2013	1934	79	Never smoked						positive	98	positive	90	Not Amplified			+/+/-	HR+/HER-	Luminal A	2
16.88	19.75	5.818	Female	Non-Spanish; Non-Hispanic	Black, African American	Breast Cancer	Breast	T2	N0		II	Invasive Ductal	Ductal	Serum	Primary	Breast	9	2012	1973	39	Previous smoker						positive	85	positive	38	Not Amplified			+/+/-	HR+/HER-	Luminal A	2
11.02	13.76	4.123	Female	Spanish; Hispanic	Latino	Breast Cancer	Breast	T2	N0	M0	II	Invasive Ductal	Ductal	Serum	Primary	Breast	5	2016	1973	43	Never smoked						negative		negative		Not Amplified			-/-/-	HR-/HER-	Triple Negative	3
29.14	22.64	10.84	Female	Non-Spanish; Non-Hispanic	White	Breast Cancer	Breast	T2	N0	M0	II	Invasive Ductal	Ductal	Serum	Primary	Breast	6	2015	1961	54	Previous smoker						negative		negative		Not Amplified			-/-/-	HR-/HER-	Triple Negative	3
22.61	16.39	5.386	Female	Non-Spanish; Non-Hispanic	White	Breast Cancer	Breast	T2	N0	M0	II	Invasive Ductal	Ductal	Serum	Primary	Breast	6	2015	1977	38	Never smoked						positive	89	positive	49	Not Amplified			+/+/-	HR+/HER-	Luminal A	1
24.36	23.94	14.86	Female	Non-Spanish; Non-Hispanic	White	Breast Cancer	Breast	T2	N0	M0	II	Invasive Ductal	Ductal	Serum	Primary	Breast	6	2015	1967	48	Never smoked						positive	100	positive	86	Amplified			+/+/+	HR+/HER+	Luminal A	1
22.46	16.56	4.65	Female	Non-Spanish; Non-Hispanic	White	Breast Cancer	Breast	T2	N0	M0	II	Invasive Ductal	Ductal	Serum	Primary	Breast	6	2015	1962	53	Never smoked						positive	100	positive	65	Not Amplified			+/+/-	HR+/HER-	Luminal A	2
24.97	22.42	8.877	Female	Non-Spanish; Non-Hispanic	White	Breast Cancer	Breast	T2	N0	M0	II	Invasive Mammary	IMammary	Serum	Primary	Breast	5	2016	1940	76	Never smoked						positive	97	positive	46	Not Amplified			+/+/-	HR+/HER-	Luminal A	2
17.9	11.36	7.576	Female	Non-Spanish; Non-Hispanic	White	Breast Cancer	Breast	T2	N0		II	Invasive Ductal	Ductal	Serum	Primary	Breast	4	2017	1948	69	Previous smoker						positive	94	positive	85	Not Amplified			+/+/-	HR+/HER-	Luminal A	2
23.41	17.87	10.62	Female	Non-Spanish; Non-Hispanic	Black, African American	Breast Cancer	Breast	T2	N0	M0	II	Invasive Mammary	IMammary	Serum	Primary	Breast	4	2017	1945	72	Previous smoker						negative		negative		Not Amplified			-/-/-	HR-/HER-	Triple Negative	3
46.09	37.75	17.96	Female	Non-Spanish; Non-Hispanic	White	Breast Cancer	Breast	T2	N2		III	Invasive Ductal	Ductal	Serum	Metastatic	Brain	6	2015	1945	70	Never smoked						negative		negative		Amplified			-/-/+	HR-/HER+	HER2 Enriched	U
26.45	13.26	9.892	Female	Non-Spanish; Non-Hispanic	Black, African American	Breast Cancer	Breast	T2	N3	M0	III	Invasive Ductal	Ductal	Serum	Primary	Breast	5	2016	1940	76	Never smoked						positive	100	positive	79	Not Amplified			+/+/-	HR+/HER-	Luminal A	2
19.33	12.85	10.57	Female	Non-Spanish; Non-Hispanic	Black, African American	Breast Cancer	Breast	T4	N3	M0	III	Invasive Ductal Adenomcarcinoma	Adenocarcinoma	Serum	Primary	Breast	6	2015	1968	47	Never smoked						negative		negative		Not Amplified			-/-/-	HR-/HER-	Triple Negative	3
25.28	13.83	8.215	Female	Non-Spanish; Non-Hispanic	White	Breast Cancer	Breast	T1	N1	M0	III	Invasive Ductal	Ductal	Serum	Primary	Breast	6	2015	1959	56	Current smoker						positive	98	positive	49	Not Amplified			+/+/-	HR+/HER-	Luminal A	1
21.59	10.9	7.286	Female	Non-Spanish; Non-Hispanic	White	Breast Cancer	Breast	T3	N1	M0	III	Invasive Ductal	Ductal	Serum	Primary	Breast	6	2015	1956	59	Previous smoker						positive	100	positive	100	Not Amplified			+/+/-	HR+/HER-	Luminal A	3
30.57	19.59	11.82	Female	Non-Spanish; Non-Hispanic	Black, African American	Breast Cancer	Breast	T3	N2		III	Invasive Mammary	IMammary	Serum	Primary	Breast	5	2016	1969	47	Current smoker						positive	92	positive	84	Not Amplified			+/+/-	HR+/HER-	Luminal A	2
27.29	11.85	7.001	Female	Non-Spanish; Non-Hispanic	White	Breast Cancer	Breast	T1	N2		III	Invasive Mammary	IMammary	Serum	Primary	Breast	5	2016	1974	42	Previous smoker						positive	82	positive	62	Not Amplified			+/+/-	HR+/HER-	Luminal A	2
21.64	15.17	7.876	Female	Non-Spanish; Non-Hispanic	Black, African American	Breast Cancer	Breast	T3	N1		III	Invasive Carcinoma with Ductal	Ductal	Serum	Primary	Breast	3	2018	1948	70	Previous smoker						positive	97	positive	92	Amplified			+/+/+	HR+/HER+	Luminal A	2
27.58	23.62	9.638	Female	Non-Spanish; Non-Hispanic	Black, African American	Breast Cancer	Breast	T3	N2		III	Invasive Micropapillary	Micropapillary	Serum	Primary	Breast	4	2017	1958	59	Previous smoker						positive	85	positive	34	Amplified			+/+/+	HR+/HER+	Luminal A	3
16.45	9.326	3.556	Female	Non-Spanish; Non-Hispanic	White	Breast Cancer	Breast	T4			III	Invasive Lobular	Lobular	Serum	Primary	Breast	4	2017	1956	61	Never smoked						positive	65	positive	72	Not Amplified			+/+/-	HR+/HER-	Luminal B	2
16.93	10.28	4.761	Female	Non-Spanish; Non-Hispanic	White	Breast Cancer	Breast				IV	Lobular Carcinoma	Lobular	Serum	Metastatic	Ovary	9	2012	1948	64	Previous smoker						positive	100	positive	84	Not Amplified			+/+/-	HR+/HER-	Luminal A	3
29.55	15.76	8.948	Female	Non-Spanish; Non-Hispanic	White	Breast Cancer	Breast				IV	Adenocarcinoma	Adenocarcinoma	Serum	Metastatic	Brain	7	2014	1947	67	Never smoked						positive	96	negative		Not Amplified			+/-/-	HR+/HER-	Luminal A	3
19.74	12.12	6.773	Female	Non-Spanish; Non-Hispanic	White	Breast Cancer	Breast	T2	N0	M1	IV	Invasive Ductal	Ductal	Serum	Primary	Breast	6	2015	1960	55	Never smoked						positive	90	positive	9	Not Amplified			+/+/-	HR+/HER-	Luminal A	2
18.62	10.87	8.975	Female	Non-Spanish; Non-Hispanic	White	Breast Cancer	Breast				IV	Invasive Ductal	Ductal	Serum	Primary	Breast	6	2015	1968	47	Never smoked						negative		negative		Not Amplified			-/-/-	HR-/HER-	Triple Negative	3
23.87	12.78	12.91	Female	Non-Spanish; Non-Hispanic	Multi-Racial	Breast Cancer	Breast	T4	N3	M1	IV	Invasive Mammary	IMammary	Serum	Primary	Breast	5	2016	1969	47	Never smoked						negative		positive	2	Amplified			-/+/+	HR+/HER+	Luminal B	2
22.68	31.51	12.57	Female	Non-Spanish; Non-Hispanic	White	Breast Cancer	Breast				IV	Carcinoma	Carcinoma	Serum	Metastatic	Brain	4	2017	1953	64	Never smoked						negative		positive	7	Not Amplified					Luminal B	U
20.27	15.02	5.672	Female	Non-Spanish; Non-Hispanic	White	Breast Cancer	Breast				IV	Adenocarcinoma	Adenocarcinoma	Serum	Metastatic	Liver	4	2017	1984	33	Previous smoker						positive	67	positive	19	Not Amplified			+/+/-	HR+/HER-	Luminal A	U
15.23	13.65	4.761	Female	Non-Spanish; Non-Hispanic	White	Breast Cancer	Breast	T2	N1	M1	IV	Invasive Ductal	Ductal	Serum	Primary	Breast	4	2017	1977	40	Never smoked						positive	2	positive	13	Amplified			+/+/+	HR+/HER+	Luminal B	3
23.52	17.31	9.662	Female	Non-Spanish; Non-Hispanic	Multi-Racial	Breast Cancer	Breast	T4	N3	M1	IV	Invasive Ductal	Ductal	Serum	Primary	Breast	5	2016	1969	47	Never smoked						negative		negative		Amplified			-/-/+	HR-/HER+	HER2 Enriched	1
30.51	16.9	16.66	Female	Non-Spanish; Non-Hispanic	White	Breast Cancer	Breast				IV	Invasive Ductal	Ductal	Serum	Recurrence	Breast	4	2017	1980	37	Never smoked						positive	89	negative		Not Amplified			+/-/-	HR+/HER-	Luminal A	3
