# Supplementary material for: Pattern Analysis of Galectin 1, 3, and 9 Serum Levels in Breast Cancer
Source: Preprints.org preprint supplement (doi:10.20944/preprints202306.1803.v1), 2023-06-26
Supplement: Supplementary file 3 [file Supplementary Materials.docx]

**Supplementary Materials**

**Tables**

Table 1. Summary of Serum Galectin Values by Cancer Patient and Sample Characteristic

|  | **Galectin-1** | | **Galectin-3** | | **Galectin-9** | |
| --- | --- | --- | --- | --- | --- | --- |
| **Characteristic** | **N** | **Mean (SD), ng/mL** | **N** | **Mean (SD), ng/mL** | **N** | **Mean (SD), ng/mL** |
| **Gender** |  |  |  |  |  |  |
| Female | 136 | 23.96 (9.22) | 136 | 11.51 (5.86) | 76 | 9.53 (4.54) |
| Undocumented | 1 | 22.98 (NA) | 1 | 8.61 (NA) | 0 | - |
| **Race** |  |  |  |  |  |  |
| Asian | 3 | 20.82 (7.11) | 3 | 6.88 (2.21) | 2 | 7.47 (1.69) |
| Black, African American | 21 | 25.73 (5.74) | 21 | 13.2 (4.81) | 11 | 9.24 (1.98) |
| Latino | 3 | 19.87 (9.55) | 3 | 11.69 (4.22) | 2 | 6.85 (3.85) |
| Multi-Racial | 2 | 23.70 (0.25) | 2 | 15.05 (3.2) | 2 | 11.29 (2.3) |
| White | 108 | 23.81 (9.85) | 108 | 11.21 (6.09) | 59 | 9.69 (5) |
| **Ethnicity** |  |  |  |  |  |  |
| Non-Spanish; Non-Hispanic | 133 | 23.89 (9.07) | 133 | 11.44 (5.89) | 74 | 9.61 (4.55) |
| Spanish; Hispanic | 4 | 25.81 (14.21) | 4 | 13.04 (4.38) | 2 | 6.85 (3.85) |
| **Cancer Tissue** |  |  |  |  |  |  |
| Breast | 138 | 24.02 (9.19) | 138 | 11.54 (5.86) | 77 | 9.58 (4.52) |
| **Stage** |  |  |  |  |  |  |
| I | 55 | 21.86 (7.86) | 54 | 11.11 (5.67) | 25 | 9.38 (3.17) |
| II | 50 | 24.96 (10.7) | 51 | 10.56 (5.15) | 28 | 10.09 (6.19) |
| III | 22 | 28.39 (8.78) | 22 | 13.37 (6.81) | 13 | 9.25 (3.29) |
| IV | 11 | 21.82 (4.85) | 11 | 14.53 (6.8) | 11 | 9.12 (3.73) |
| **T** |  |  |  |  |  |  |
| T1 | 51 | 23.85 (9.36) | 50 | 11.69 (5.48) | 24 | 9.5 (3.19) |
| T2 | 43 | 23.86 (9.51) | 43 | 11.83 (6.56) | 26 | 9.59 (5.85) |
| T3 | 9 | 26.7 (4.86) | 10 | 12.36 (5.69) | 7 | 9.01 (2.49) |
| T4 | 5 | 26.79 (13.75) | 5 | 13.14 (2.84) | 4 | 9.17 (3.99) |
| **N** |  |  |  |  |  |  |
| N0 | 67 | 22.86 (8.66) | 67 | 12.06 (5.51) | 36 | 9.74 (5.26) |
| N1 | 23 | 25.69 (10.32) | 23 | 9.58 (4.44) | 11 | 8.25 (2.2) |
| N2 | 10 | 32.27 (9.59) | 10 | 15.77 (9.08) | 6 | 10.71 (3.88) |
| N3 | 5 | 22.45 (3.17) | 5 | 11.97 (5.02) | 5 | 10.33 (1.6) |
| **M** |  |  |  |  |  |  |
| M0 | 55 | 23.42 (7.35) | 55 | 11.7 (5.13) | 27 | 9.3 (3.09) |
| M1 | 5 | 20.29 (3.56) | 5 | 11.9 (5.03) | 5 | 8.55 (3.07) |
| **Specimen Considered** |  |  |  |  |  |  |
| Benign | 6 | 24.45 (4.3) | 6 | 9.12 (3.3) | 3 | 8.72 (0.11) |
| Metastatic | 14 | 24.63 (9.57) | 14 | 14.04 (9.5) | 12 | 10.26 (4.49) |
| Primary | 107 | 24.3 (9.61) | 107 | 11.6 (5.34) | 57 | 9.47 (4.74) |
| Recurrence | 10 | 20.94 (5.7) | 10 | 9.56 (5.06) | 5 | 9.71 (4.17) |
| **Tissue Site** |  |  |  |  |  |  |
| Axillary | 1 | 23.74 | 1 | 7.12 | 1 | 9.09 |
| Brain | 4 | 28.65 (12.83) | 4 | 23.13 (13.93) | 4 | 11.47 (5.01) |
| Breast | 118 | 24.03 (9.3) | 118 | 11.33 (5.28) | 63 | 9.45 (4.61) |
| Chest Wall | 2 | 17.52 (3.22) | 2 | 5.86 (4.56) | 1 | 8.03 |
| Liver | 2 | 25.86 (7.91) | 2 | 13.17 (2.62) | 2 | 8.38 (3.82) |
| Lung | 1 | 30.22 | 1 | 3.78 | 0 | - |
| Lymph Node | 5 | 21.7 (6.32) | 5 | 13.57 (3.42) | 3 | 11.08 (2.15) |
| Neck | 1 | 40.82 | 1 | 9.71 | 1 | 18.20 |
| Ovary | 2 | 17.38 (0.63) | 2 | 10.17 (0.16) | 2 | 5.44 (0.96) |
| **Smoking History** |  |  |  |  |  |  |
| Current smoker | 15 | 26.55 (9.49) | 15 | 11.61 (3.26) | 7 | 9.78 (4.86) |
| Never smoked | 75 | 23.53 (9.21) | 76 | 11.79 (6.52) | 46 | 10.03 (5.28) |
| Previous smoker | 41 | 24.24 (9.11) | 40 | 11.53 (5.38) | 23 | 8.75 (2.37) |
| **Tissue Exposure** |  |  |  |  |  |  |
| No | 33 | 21.95 (10.4) | 33 | 9 (3.77) | 14 | 11.14 (7.31) |
| Yes | 42 | 26.27 (9.63) | 43 | 9.81 (3.69) | 17 | 10.06 (4.35) |
| **ER Expression** |  |  |  |  |  |  |
| Positive | 95 | 24.38 (8.61) | 94 | 11.59 (5.36) | 49 | 8.82 (2.9) |
| Negative | 43 | 23.24 (10.42) | 44 | 11.43 (6.86) | 28 | 10.91 (6.31) |
| **PR Expression** |  |  |  |  |  |  |
| Positive | 80 | 24.18 (8.64) | 79 | 12.09 (5.92) | 45 | 8.74 (2.83) |
| Negative | 58 | 23.81 (9.97) | 59 | 10.81 (5.73) | 32 | 10.75 (6.03) |
| **HER2 Expression** |  |  |  |  |  |  |
| Amplified | 49 | 25.21 (10.94) | 48 | 11.03 (6.02) | 27 | 11.03 (6.06) |
| Not Amplified | 89 | 23.37 (8.07) | 90 | 11.81 (5.78) | 50 | 8.79 (3.23) |
| **Subtype** |  |  |  |  |  |  |
| HER2 Enriched | 10 | 27.04 (14.97) | 10 | 13.09 (9.82) | 10 | 13.54 (9.15) |
| Luminal A | 79 | 24.74 (8.73) | 78 | 12.01 (5.52) | 41 | 9.01 (2.84) |
| Luminal B | 18 | 22.66 (7.58) | 18 | 10.92 (6.41) | 10 | 8.8 (3.48) |
| Triple Negative | 31 | 22.01 (8.86) | 32 | 10.25 (4.69) | 16 | 9.04 (3.55) |
